# Supplementary material for: Enhanced Expression of ANO1 in Head and Neck Squamous Cell Carcinoma Causes Cell Migration and Correlates with Poor Prognosis
Source: PLoS One. 2012 Aug 17;7(8):e43265. doi: 10.1371/journal.pone.0043265 (PMC3422276; doi:10.1371/journal.pone.0043265)
Supplement: Table S1 — Correlation between Ano1 protein expression and 11q13 amplification in non-HNSCC tumors. IHC (Ano1) and FISH (11q13) analysis of a small TMA constructed from Ano1 positive samples from the multi tumor TMA (A) and from breast and bladder cancers with known 11q13 amplification from previous studies [23], [24] (B). Only samples with evaluable IHC and FISH status were considered for this analysis. A) None of the Ano1 protein positive non-HNSCC tumors from the multi-tumor TMA showed amplification of the 11q13 locus. B) A substantial part of 11q13 amplified bladder cancers (6/14) and breast cancers (4/11) showed Ano1 protein expression. (XLS) [file pone.0043265.s001.xls]

## Sheet: Table 3
Supplementary TABLE 1
A
Analysis of 11q13 amplification in Ano1 protein expressing tumors:
Tumor type	Ano1 (IHC) positive samples	Ano1 (IHC) positive and 11q13 amplified
Endometrium, carcinoma	3	0
Esophagus, SCC	2	0
Hepatocellular carcinoma	1	0
Glioblastoma multiforme	1	0
GIST	8	0
Pancreas, adenocarcinoma	1	0
Salivary gland, adenoidcystic carcinoma	1	0
B
Analysis of the Ano1 protein expression in 11q13 amplified bladder and breast cancers:
Tumor type	11q13 amplified samples	11q13 amplified and Ano1 (IHC) positive
Bladder carcinoma, non-invasive (pTa)	5	3 (60%)
Bladder carcinoma, muscle-invasive (pT2)	9	3 (33%)
Breast carcinoma	11	4 (36%)
