# Supplementary material for: Enhanced Expression of ANO1 in Head and Neck Squamous Cell Carcinoma Causes Cell Migration and Correlates with Poor Prognosis
Source: PLoS One. 2012 Aug 17;7(8):e43265. doi: 10.1371/journal.pone.0043265 (PMC3422276; doi:10.1371/journal.pone.0043265)
Supplement: Table S3 — Multivariate analysis (Cox Proportional Hazards) of overall survival in HNSCC. Genomic amplification and protein expression status of Ano1 were assessed by FISH and IHC, respectively. (CI: Confidence interval). (XLS) [file pone.0043265.s003.xls]

## Sheet: Tabelle1
Supplementary Table 3
		Cox Proportional Hazards
Marker		Estimate	95% CI	P-value
Localization:	Oral cavity	-0.34	-0.88/0.44	0.608
	Oropharynx	-0.03	-0.64/0.78
	Larynx	0.19	-1.97/1.38
pT		0.58	0.32/0.84	0.003
ANO1 amplification		-0.37	-1.31/0.43	0.382
Ano1 protein		1.11	0.18/1.9	0.022
