# Supplementary material for: Enhanced Expression of ANO1 in Head and Neck Squamous Cell Carcinoma Causes Cell Migration and Correlates with Poor Prognosis
Source: PLoS One. 2012 Aug 17;7(8):e43265. doi: 10.1371/journal.pone.0043265 (PMC3422276; doi:10.1371/journal.pone.0043265)
Supplement: Table S4 — Multi-tumor tissue microarray. Complete listing of Ano1 expression in various tumors and normal tissues. (XLS) [file pone.0043265.s004.xls]

## Sheet: Tabelle1
Supplementary Table 4
			Ano1 (IHC)
Organ	Tumor type	Spots on TMA (n)	Analyzable (n)	Negative (n)	Positive (n)	Positivity (%)
Adrenal gland	Adenoma	14	14	14	0	0
	Pheochromocytoma	28	27	27	0	0
Brain	Meningeoma	48	48	48	0	0
	Astrocytoma	48	48	48	0	0
	Glioblastoma multiforme	44	38	37	1	2.63158
	Oligodendroglioma	25	23	23	0	0
	Normal	18	10	10	0	0
Breast	Ductal carcinoma	45	34	34	0	0
	Lobular carcinoma	40	20	20	0	0
	Medullary carcinoma	60	53	53	0	0
	Tubular carcinoma	20	17	17	0	0
	Mucinous carcinoma	26	22	22	0	0
	Normal	5	4	4	0	0
Colon	Adenoma, mild dysplasia	36	23	23	0	0
	Adenoma, moderate dysplasia	79	70	70	0	0
	Adenoma, severe dysplasia	28	25	25	0	0
	Adenocarcinoma	49	40	40	0	0
	Normal	5	1	1	0	0
Endometrium	Endometroid carcinoma	49	47	43	4	8.51064
	Serous carcinoma	32	30	30	0	0
	Normal	15	5	5	0	0
Esophagus	Adenocarcinoma	9	8	7	1	12.5
	Squamous cell carcinoma	33	31	27	4	12.9032
	Small cell carcinoma	1	1	1	0	0
	Normal	10	5	5	0	0
Gall bladder	Adenocarcinoma	45	37	33	4	10.8108
	Normal	9	6	3	3	50
Kidney	Clear cell carcinoma	58	52	52	0	0
	Papillary carcinoma	38	33	33	0	0
	Chromophobic carcinoma	11	11	11	0	0
	Oncocytoma	24	22	22	0	0
	Normal	21	12	12	0	0
Larynx	Squamous cell carcinoma	58	38	34	4	10.5263
Liver	Hepatocellular carcinoma	97	81	79	2	2.46914
	Normal	20	13	13	0	0
Lung	Squamous cell carcinoma	45	44	44	0	0
	Adenocarcinoma	83	74	74	0	0
	Large cell cancer	25	23	23	0	0
	Small cell cancer	49	46	46	0	0
	Bronchoalveolar carcinoma	7	7	7	0	0
	Normal	17	9	9	0	0
Lymphatic tissue	NHL, diffuse large B	10	9	9	0	0
	NHL, others	56	54	54	0	0
	Hodgkin lymphoma, mixed cell	17	15	15	0	0
	Hodgkin lymphoma, nodular sclerosis	25	24	24	0	0
	Normal	17	0	0	0	-
Myometrium	Leiomyoma	57	57	57	0	0
	Normal	12	10	10	0	0
Neuroendocrine tissue	Paraganglioma	8	8	8	0	0
	Carcinoid tumor	37	35	35	0	0
Oral cavity	Squamous cell carcinoma	50	46	40	6	13.0435
	Normal	10	2	2	0	0
Ovary	Serous cancer	47	45	45	0	0
	Mucinous cancer	21	15	15	0	0
	Endometroid cancer	43	41	41	0	0
Pancreas	Adenocarcinoma	49	42	39	3	7.14286
	Normal	10	10	10	0	0
Parathyroid	Adenoma	43	34	34	0	0
	Normal	2	2	2	0	0
Peripheral nerves	Neurofibroma	41	37	37	0	0
	Schwannoma	49	41	41	0	0
Pleura	Malignant mesothelioma	31	26	26	0	0
Prostate	Adenocarcinoma, castration-resistant	41	30	30	0	0
	Adenocarcinoma, untreated	50	38	38	0	0
	Normal	26	17	17	0	0
Salivary gland	Warthin tumor	25	18	18	0	0
	Pleomorphic adenoma	49	34	33	1	2.94118
	Adenoid-cystic carcinoma	33	28	27	1	3.57143
	Normal	13	0	0	0	-
Skin	Basalioma	73	60	60	0	0
	Squamous cell carcinoma	38	28	28	0	0
	Benign appendix tumor	19	14	14	0	0
	Malignant melanoma	78	69	69	0	0
	Benign nevus	44	26	26	0	0
	Benign histiocytoma	28	26	26	0	0
	Kapillary hemangioma	34	32	32	0	0
	Kaposi Sarcoma	25	21	21	0	0
	Normal	29	20	20	0	0
Small intestine	Adenocarcinoma	22	19	18	1	5.26316
	Normal	4	1	1	0	0
Soft tissue	Lipoma	29	28	28	0	0
	Liposarcoma	28	25	25	0	0
	Malignant fibrous histiocytoma	30	29	29	0	0
	Leiomyosarcoma	35	35	33	2	5.71429
	GIST	12	11	0	11	100
	Tendon sheet, giant cell tumor	28	25	25	0	0
	Normal (fat)	3	3	3	0	0
	Normal (sceletal muscle)	24	18	15	3	16.6667
	Normal (smooth muscle)	12	8	8	0	0
Stomach	Diffuse adenocarcinoma	25	23	23	0	0
	Intestinal adenocarcinoma	51	40	40	0	0
	Normal	8	4	4	0	0
Testis	Seminoma	49	49	49	0	0
	Non-seminomatous cancer	48	43	43	0	0
	Normal	21	11	11	0	0
Thymus	Thymoma	37	33	33	0	0
	Normal	3	0	0	0	-
Thyroid	Adenoma	39	34	34	0	0
	Follicular carcinoma	58	54	54	0	0
	Papillary carcinoma	34	27	27	0	0
	Normal	17	13	13	0	0
Urinary bladder	Urothelial carcinoma, non-invasive (pTa)	38	36	35	1	2.77778
	Urothelial carcinoma, invasive (pT2-4)	78	60	59	1	1.66667
	Normal	3	1	1	0	0
Uterus, cervix	CIN III	39	21	21	0	0
Vulva	Squamous cell carcinoma	28	20	20	0	0
	Total:	3417	2837	2784	53
